# Supplementary material
Source: Elsevier journal article supplement (https://comptes-rendus.academie-sciences.fr/biologies/article/10.1016/j.crvi.2014.10.007/file/attach/mmc1.pdf)
Supplement: mmc1 [file mmc1.pdf]

Supplementary Table: Genetics differences among 45 *P. oleracea* accessions revealed from ISSR data analysis

| Acc. | Ac1  | Ac2  | Ac3  | Ac4  | Ac5  | Ac6  | Ac7  | Ac8  | Ac9  | Ac10 | Ac11 | Ac12 | Ac13 | Ac14 | Ac15 | Ac16 |
|------|------|------|------|------|------|------|------|------|------|------|------|------|------|------|------|------|
| Ac1  | 1.00 |      |      |      |      |      |      |      |      |      |      |      |      |      |      |      |
| Ac2  | 0.83 | 1.00 |      |      |      |      |      |      |      |      |      |      |      |      |      |      |
| Ac3  | 0.53 | 0.54 | 1.00 |      |      |      |      |      |      |      |      |      |      |      |      |      |
| Ac4  | 0.53 | 0.55 | 0.85 | 1.00 |      |      |      |      |      |      |      |      |      |      |      |      |
| Ac5  | 0.59 | 0.51 | 0.83 | 0.81 | 1.00 |      |      |      |      |      |      |      |      |      |      |      |
| Ac6  | 0.82 | 0.78 | 0.56 | 0.55 | 0.57 | 1.00 |      |      |      |      |      |      |      |      |      |      |
| Ac7  | 0.71 | 0.74 | 0.55 | 0.56 | 0.53 | 0.83 | 1.00 |      |      |      |      |      |      |      |      |      |
| Ac8  | 0.77 | 0.71 | 0.58 | 0.57 | 0.59 | 0.80 | 0.83 | 1.00 |      |      |      |      |      |      |      |      |
| Ac9  | 0.72 | 0.69 | 0.61 | 0.64 | 0.61 | 0.73 | 0.77 | 0.81 | 1.00 |      |      |      |      |      |      |      |
| Ac10 | 0.73 | 0.75 | 0.56 | 0.58 | 0.55 | 0.76 | 0.80 | 0.77 | 0.78 | 1.00 |      |      |      |      |      |      |
| Ac11 | 0.46 | 0.49 | 0.81 | 0.83 | 0.75 | 0.46 | 0.49 | 0.52 | 0.59 | 0.53 | 1.00 |      |      |      |      |      |
| Ac12 | 0.53 | 0.55 | 0.80 | 0.85 | 0.75 | 0.57 | 0.58 | 0.57 | 0.62 | 0.57 | 0.88 | 1.00 |      |      |      |      |
| Ac13 | 0.50 | 0.52 | 0.80 | 0.85 | 0.77 | 0.56 | 0.58 | 0.60 | 0.63 | 0.59 | 0.83 | 0.86 | 1.00 |      |      |      |
| Ac14 | 0.50 | 0.49 | 0.79 | 0.83 | 0.76 | 0.51 | 0.53 | 0.54 | 0.60 | 0.55 | 0.83 | 0.84 | 0.86 | 1.00 |      |      |
| Ac15 | 0.46 | 0.48 | 0.77 | 0.79 | 0.73 | 0.49 | 0.51 | 0.53 | 0.56 | 0.53 | 0.79 | 0.84 | 0.82 | 0.83 | 1.00 |      |
| Ac16 | 0.48 | 0.50 | 0.79 | 0.79 | 0.73 | 0.52 | 0.55 | 0.55 | 0.58 | 0.54 | 0.81 | 0.84 | 0.86 | 0.84 | 0.87 | 1.00 |
| Ac17 | 0.52 | 0.54 | 0.80 | 0.82 | 0.76 | 0.57 | 0.56 | 0.57 | 0.62 | 0.60 | 0.77 | 0.80 | 0.85 | 0.81 | 0.78 | 0.82 |
| Ac18 | 0.71 | 0.65 | 0.56 | 0.53 | 0.57 | 0.71 | 0.62 | 0.64 | 0.63 | 0.62 | 0.53 | 0.55 | 0.50 | 0.51 | 0.45 | 0.49 |
| Ac19 | 0.78 | 0.73 | 0.51 | 0.52 | 0.52 | 0.78 | 0.72 | 0.75 | 0.68 | 0.74 | 0.45 | 0.53 | 0.48 | 0.49 | 0.47 | 0.47 |
| Ac20 | 0.75 | 0.74 | 0.54 | 0.57 | 0.54 | 0.77 | 0.76 | 0.76 | 0.72 | 0.73 | 0.50 | 0.57 | 0.58 | 0.55 | 0.49 | 0.52 |
| Ac21 | 0.51 | 0.53 | 0.79 | 0.80 | 0.78 | 0.55 | 0.54 | 0.56 | 0.61 | 0.57 | 0.81 | 0.82 | 0.82 | 0.79 | 0.77 | 0.76 |
| Ac22 | 0.54 | 0.53 | 0.80 | 0.82 | 0.77 | 0.52 | 0.52 | 0.54 | 0.61 | 0.54 | 0.82 | 0.81 | 0.82 | 0.79 | 0.79 | 0.79 |
| Ac23 | 0.52 | 0.54 | 0.77 | 0.80 | 0.71 | 0.49 | 0.53 | 0.55 | 0.60 | 0.57 | 0.81 | 0.76 | 0.78 | 0.75 | 0.74 | 0.75 |
| Ac24 | 0.53 | 0.53 | 0.73 | 0.79 | 0.72 | 0.53 | 0.52 | 0.58 | 0.60 | 0.59 | 0.77 | 0.75 | 0.81 | 0.77 | 0.77 | 0.76 |
| Ac25 | 0.52 | 0.54 | 0.76 | 0.81 | 0.73 | 0.52 | 0.55 | 0.58 | 0.63 | 0.62 | 0.76 | 0.77 | 0.81 | 0.75 | 0.75 | 0.76 |
| Ac26 | 0.53 | 0.54 | 0.76 | 0.82 | 0.73 | 0.52 | 0.54 | 0.58 | 0.62 | 0.60 | 0.78 | 0.79 | 0.82 | 0.76 | 0.76 | 0.75 |
| Ac27 | 0.54 | 0.56 | 0.76 | 0.82 | 0.73 | 0.57 | 0.56 | 0.57 | 0.61 | 0.62 | 0.74 | 0.79 | 0.81 | 0.76 | 0.77 | 0.77 |
| Ac28 | 0.54 | 0.57 | 0.75 | 0.80 | 0.73 | 0.56 | 0.53 | 0.56 | 0.60 | 0.61 | 0.74 | 0.76 | 0.80 | 0.73 | 0.78 | 0.74 |
| Ac29 | 0.51 | 0.54 | 0.75 | 0.78 | 0.72 | 0.55 | 0.55 | 0.56 | 0.61 | 0.63 | 0.76 | 0.78 | 0.80 | 0.81 | 0.75 | 0.76 |
| Ac30 | 0.74 | 0.75 | 0.51 | 0.53 | 0.49 | 0.79 | 0.73 | 0.74 | 0.69 | 0.72 | 0.45 | 0.53 | 0.52 | 0.49 | 0.48 | 0.48 |
| Ac31 | 0.74 | 0.73 | 0.58 | 0.57 | 0.57 | 0.77 | 0.71 | 0.76 | 0.72 | 0.79 | 0.51 | 0.57 | 0.59 | 0.55 | 0.50 | 0.54 |
| Ac32 | 0.53 | 0.54 | 0.73 | 0.81 | 0.73 | 0.57 | 0.57 | 0.56 | 0.60 | 0.59 | 0.73 | 0.79 | 0.81 | 0.76 | 0.78 | 0.79 |
| Ac33 | 0.52 | 0.52 | 0.72 | 0.78 | 0.71 | 0.53 | 0.49 | 0.51 | 0.58 | 0.58 | 0.72 | 0.74 | 0.78 | 0.74 | 0.70 | 0.70 |
| Ac34 | 0.52 | 0.53 | 0.75 | 0.83 | 0.73 | 0.52 | 0.48 | 0.52 | 0.60 | 0.56 | 0.77 | 0.79 | 0.81 | 0.79 | 0.78 | 0.76 |
| Ac35 | 0.54 | 0.55 | 0.72 | 0.76 | 0.70 | 0.53 | 0.56 | 0.61 | 0.57 | 0.58 | 0.69 | 0.72 | 0.78 | 0.70 | 0.67 | 0.72 |
| Ac36 | 0.46 | 0.52 | 0.79 | 0.82 | 0.71 | 0.48 | 0.48 | 0.51 | 0.58 | 0.56 | 0.78 | 0.78 | 0.79 | 0.77 | 0.77 | 0.76 |
| Ac37 | 0.51 | 0.54 | 0.75 | 0.80 | 0.71 | 0.51 | 0.49 | 0.54 | 0.59 | 0.57 | 0.74 | 0.74 | 0.77 | 0.71 | 0.72 | 0.73 |
| Ac38 | 0.52 | 0.52 | 0.75 | 0.79 | 0.71 | 0.52 | 0.53 | 0.57 | 0.65 | 0.60 | 0.79 | 0.76 | 0.79 | 0.75 | 0.73 | 0.73 |
| Ac39 | 0.48 | 0.50 | 0.73 | 0.79 | 0.69 | 0.49 | 0.47 | 0.50 | 0.58 | 0.56 | 0.76 | 0.77 | 0.78 | 0.78 | 0.71 | 0.73 |
| Ac40 | 0.57 | 0.58 | 0.78 | 0.80 | 0.72 | 0.57 | 0.55 | 0.58 | 0.61 | 0.62 | 0.76 | 0.78 | 0.77 | 0.76 | 0.74 | 0.75 |
| Ac41 | 0.53 | 0.51 | 0.79 | 0.83 | 0.75 | 0.54 | 0.54 | 0.55 | 0.58 | 0.57 | 0.76 | 0.77 | 0.78 | 0.76 | 0.75 | 0.80 |
| Ac42 | 0.53 | 0.55 | 0.80 | 0.81 | 0.74 | 0.52 | 0.52 | 0.57 | 0.61 | 0.56 | 0.76 | 0.74 | 0.77 | 0.75 | 0.71 | 0.75 |
| Ac43 | 0.72 | 0.75 | 0.46 | 0.48 | 0.46 | 0.71 | 0.64 | 0.67 | 0.60 | 0.71 | 0.38 | 0.43 | 0.40 | 0.40 | 0.47 | 0.41 |
| Ac44 | 0.74 | 0.76 | 0.52 | 0.53 | 0.50 | 0.74 | 0.68 | 0.73 | 0.65 | 0.72 | 0.44 | 0.49 | 0.47 | 0.48 | 0.45 | 0.43 |
| Ac45 | 0.53 | 0.56 | 0.77 | 0.79 | 0.69 | 0.57 | 0.55 | 0.58 | 0.60 | 0.57 | 0.75 | 0.78 | 0.78 | 0.74 | 0.72 | 0.76 |

Supplementary Table: Continued

| Acc. | Ac17 | Ac18 | Ac19 | Ac20 | Ac21 | Ac22 | Ac23 | Ac24 | Ac25 | Ac26 | Ac27 | Ac28 | Ac29 | Ac30 | Ac31 |
|------|------|------|------|------|------|------|------|------|------|------|------|------|------|------|------|
| Ac17 | 1.00 |      |      |      |      |      |      |      |      |      |      |      |      |      |      |
| Ac18 | 0.52 | 1.00 |      |      |      |      |      |      |      |      |      |      |      |      |      |
| Ac19 | 0.52 | 0.76 | 1.00 |      |      |      |      |      |      |      |      |      |      |      |      |
| Ac20 | 0.60 | 0.73 | 0.84 | 1.00 |      |      |      |      |      |      |      |      |      |      |      |
| Ac21 | 0.84 | 0.53 | 0.52 | 0.61 | 1.00 |      |      |      |      |      |      |      |      |      |      |
| Ac22 | 0.83 | 0.53 | 0.48 | 0.54 | 0.88 | 1.00 |      |      |      |      |      |      |      |      |      |
| Ac23 | 0.81 | 0.50 | 0.48 | 0.52 | 0.80 | 0.86 | 1.00 |      |      |      |      |      |      |      |      |
| Ac24 | 0.83 | 0.49 | 0.51 | 0.55 | 0.80 | 0.82 | 0.91 | 1.00 |      |      |      |      |      |      |      |
| Ac25 | 0.82 | 0.46 | 0.49 | 0.56 | 0.84 | 0.84 | 0.83 | 0.84 | 1.00 |      |      |      |      |      |      |
| Ac26 | 0.84 | 0.47 | 0.48 | 0.55 | 0.84 | 0.88 | 0.87 | 0.86 | 0.88 | 1.00 |      |      |      |      |      |
| Ac27 | 0.87 | 0.49 | 0.53 | 0.58 | 0.83 | 0.84 | 0.86 | 0.89 | 0.87 | 0.89 | 1.00 |      |      |      |      |
| Ac28 | 0.83 | 0.47 | 0.53 | 0.59 | 0.83 | 0.84 | 0.83 | 0.85 | 0.90 | 0.89 | 0.89 | 1.00 |      |      |      |
| Ac29 | 0.82 | 0.50 | 0.50 | 0.56 | 0.85 | 0.83 | 0.80 | 0.81 | 0.88 | 0.88 | 0.85 | 0.89 | 1.00 |      |      |
| Ac30 | 0.53 | 0.75 | 0.82 | 0.84 | 0.54 | 0.52 | 0.48 | 0.51 | 0.52 | 0.51 | 0.54 | 0.56 | 0.54 | 1.00 |      |
| Ac31 | 0.61 | 0.64 | 0.78 | 0.81 | 0.59 | 0.56 | 0.50 | 0.55 | 0.60 | 0.53 | 0.58 | 0.60 | 0.59 | 0.84 | 1.00 |
| Ac32 | 0.84 | 0.50 | 0.49 | 0.56 | 0.80 | 0.81 | 0.78 | 0.82 | 0.82 | 0.83 | 0.86 | 0.82 | 0.82 | 0.53 | 0.56 |
| Ac33 | 0.79 | 0.51 | 0.54 | 0.57 | 0.81 | 0.81 | 0.76 | 0.81 | 0.81 | 0.83 | 0.86 | 0.83 | 0.82 | 0.52 | 0.55 |
| Ac34 | 0.78 | 0.47 | 0.48 | 0.51 | 0.76 | 0.83 | 0.75 | 0.77 | 0.83 | 0.84 | 0.81 | 0.82 | 0.81 | 0.50 | 0.52 |
| Ac35 | 0.74 | 0.48 | 0.51 | 0.55 | 0.72 | 0.75 | 0.72 | 0.72 | 0.77 | 0.77 | 0.76 | 0.74 | 0.76 | 0.49 | 0.58 |
| Ac36 | 0.79 | 0.49 | 0.49 | 0.52 | 0.80 | 0.83 | 0.82 | 0.81 | 0.85 | 0.84 | 0.81 | 0.85 | 0.83 | 0.51 | 0.53 |
| Ac37 | 0.74 | 0.53 | 0.51 | 0.53 | 0.76 | 0.78 | 0.76 | 0.76 | 0.78 | 0.82 | 0.79 | 0.80 | 0.81 | 0.53 | 0.53 |
| Ac38 | 0.76 | 0.50 | 0.49 | 0.56 | 0.77 | 0.79 | 0.77 | 0.76 | 0.80 | 0.81 | 0.77 | 0.79 | 0.81 | 0.50 | 0.56 |
| Ac39 | 0.77 | 0.49 | 0.44 | 0.49 | 0.75 | 0.78 | 0.74 | 0.78 | 0.77 | 0.78 | 0.77 | 0.75 | 0.77 | 0.46 | 0.53 |
| Ac40 | 0.78 | 0.54 | 0.51 | 0.56 | 0.79 | 0.83 | 0.80 | 0.77 | 0.85 | 0.83 | 0.80 | 0.83 | 0.88 | 0.56 | 0.60 |
| Ac41 | 0.79 | 0.55 | 0.47 | 0.53 | 0.75 | 0.79 | 0.75 | 0.73 | 0.80 | 0.81 | 0.79 | 0.80 | 0.79 | 0.51 | 0.55 |
| Ac42 | 0.79 | 0.52 | 0.50 | 0.55 | 0.78 | 0.79 | 0.77 | 0.73 | 0.80 | 0.77 | 0.78 | 0.75 | 0.79 | 0.49 | 0.56 |
| Ac43 | 0.47 | 0.64 | 0.76 | 0.72 | 0.47 | 0.45 | 0.42 | 0.47 | 0.44 | 0.46 | 0.47 | 0.48 | 0.47 | 0.72 | 0.71 |
| Ac44 | 0.51 | 0.67 | 0.78 | 0.73 | 0.53 | 0.49 | 0.48 | 0.53 | 0.51 | 0.52 | 0.52 | 0.53 | 0.51 | 0.74 | 0.74 |
| Ac45 | 0.77 | 0.54 | 0.49 | 0.56 | 0.77 | 0.79 | 0.79 | 0.79 | 0.79 | 0.81 | 0.81 | 0.79 | 0.80 | 0.55 | 0.53 |

Supplementary Table: Continued

| Acc. | Ac32 | Ac33 | Ac34 | Ac35 | Ac36 | Ac37 | Ac38 | Ac39 | Ac40 | Ac41 | Ac42 | Ac43 | Ac44 | Ac45 |
|------|------|------|------|------|------|------|------|------|------|------|------|------|------|------|
| Ac32 | 1.00 |      |      |      |      |      |      |      |      |      |      |      |      |      |
| Ac33 | 0.78 | 1.00 |      |      |      |      |      |      |      |      |      |      |      |      |
| Ac34 | 0.82 | 0.86 | 1.00 |      |      |      |      |      |      |      |      |      |      |      |
| Ac35 | 0.74 | 0.78 | 0.78 | 1.00 |      |      |      |      |      |      |      |      |      |      |
| Ac36 | 0.77 | 0.85 | 0.87 | 0.80 | 1.00 |      |      |      |      |      |      |      |      |      |
| Ac37 | 0.77 | 0.86 | 0.86 | 0.82 | 0.87 | 1.00 |      |      |      |      |      |      |      |      |
| Ac38 | 0.75 | 0.84 | 0.83 | 0.81 | 0.86 | 0.88 | 1.00 |      |      |      |      |      |      |      |
| Ac39 | 0.75 | 0.85 | 0.83 | 0.79 | 0.82 | 0.84 | 0.84 | 1.00 |      |      |      |      |      |      |
| Ac40 | 0.80 | 0.81 | 0.86 | 0.80 | 0.85 | 0.85 | 0.82 | 0.82 | 1.00 |      |      |      |      |      |
| Ac41 | 0.79 | 0.77 | 0.85 | 0.78 | 0.82 | 0.85 | 0.83 | 0.82 | 0.88 | 1.00 |      |      |      |      |
| Ac42 | 0.74 | 0.73 | 0.77 | 0.73 | 0.80 | 0.79 | 0.77 | 0.76 | 0.81 | 0.83 | 1.00 |      |      |      |
| Ac43 | 0.49 | 0.44 | 0.44 | 0.41 | 0.44 | 0.51 | 0.44 | 0.42 | 0.51 | 0.45 | 0.46 | 1.00 |      |      |
| Ac44 | 0.51 | 0.55 | 0.49 | 0.52 | 0.49 | 0.56 | 0.50 | 0.51 | 0.55 | 0.49 | 0.47 | 0.80 | 1.00 |      |
| Ac45 | 0.77 | 0.77 | 0.77 | 0.76 | 0.81 | 0.79 | 0.79 | 0.73 | 0.82 | 0.77 | 0.75 | 0.44 | 0.50 | 1.00 |
